# Supplementary material
Source: PubMed Central journal article supplement (PMC3162423)

# LYSOSOMAL ACID LIPASE DEFICIENCY IMPAIRS REGULATION OF ABCA1 AND FORMATION OF HIGH DENSITY LIPOPROTEINS IN CHOLESTERYL ESTER STORAGE DISEASE\*

Kristin L. Bowden<sup>‡1,2</sup>, Nicolas J. Bilbey<sup>‡1</sup>, Leanne M. Bilawchuk<sup>‡</sup>, Emmanuel Boadu<sup>‡</sup>, Rohini Sidhu<sup>§</sup>, Daniel S. Ory<sup>§</sup>, Hong Du<sup>+</sup>, Teddy Chan<sup>‡</sup>, and Gordon A. Francis<sup>‡</sup>

From the <sup>‡</sup>Department of Medicine, Institute for Heart and Lung Health, St. Paul's Hospital, Vancouver, British Columbia V6Z 1Y6, <sup>§</sup>Diabetic Cardiovascular Disease Center, Washington University School of Medicine, St. Louis, Missouri 63110, and <sup>+</sup>Department of Pediatrics, University of Cincinnati College of Medicine, Cincinnati, Ohio 45229

Running title: Impaired ABCA1 expression in Cholesteryl Ester Storage Disease  
Corresponding author: Gordon A. Francis, Rm 166 Burrard Building, St. Paul's Hospital, 1081 Burrard St., Vancouver, BC V6Z 1Y6. E-mail gordon.francis@hli.ubc.ca

## Supplemental Data

Supplemental Figure Legends:

**Supplemental Figure 1. Recombinant human LAL rescues ABCA1 expression and apoA-I-mediated cholesterol efflux in CESD fibroblasts.** Normal (NL1) and CESD (CD1, CD2) fibroblasts were grown to confluence in DMEM containing 5% LPDS. Recombinant human LAL (rhLAL) was added to CD1 and CD2 fibroblasts at the concentrations indicated ( $\mu\text{g/ml}$  medium) (**A**) or 1.2  $\mu\text{g/ml}$  rhLAL (**B,C,D**) for 24 hours. Cell monolayers were then incubated in DMEM with (+) or without (-) 50  $\mu\text{g/ml}$  LDL (**A**) or 50  $\mu\text{g/ml}$  [<sup>3</sup>H]cholesteryl-linoleate LDL (**B,C,D**) for 24 h. ABCA1 protein in cell lysates was analyzed by western blot (**A**) as described in Figure 1. Cells were incubated with 10  $\mu\text{g/ml}$  apoA-I for 24 h and [<sup>3</sup>H]cholesterol in the medium and cell lipid extracts was determined as in Figure 2. Results indicate the percent of total [<sup>3</sup>H]cholesterol in the medium (**B**), cell CE (**C**) or cell UC (**D**), mean  $\pm$  SD of triplicates, and are representative of 3 experiments with similar results. \*, values significantly greater (**B,C**) or lower (**D**) than non-conditioned medium-treated CESD cells,  $p < 0.05$ .

**Supplemental Figure 2. Reduced  $\alpha$ -HDL particle formation by CESD fibroblasts is rescued following treatment with recombinant human LAL.** Fibroblasts were treated as in Supplemental figure 1 with or without 1.2  $\mu\text{g/ml}$  recombinant human LAL (rhLAL or no addition, NA). Efflux medium following a subsequent 24 h incubation with 10  $\mu\text{g/ml}$  apoA-I was concentrated to 1/10 volume and 20  $\mu\text{l}$  of each sample was run in the first dimension on 0.75 % agarose and, separated in the second dimension on a 5-23% gradient gel, and analyzed by western blot using a rabbit polyclonal antibody to human apoA-I. Boxed areas represent  $\alpha$ -HDL particles. Blots are representative of 2 experiments with similar results.

**Supplemental Figure 3. 27-HC formation following treatment with recombinant human LAL.** Normal (NL1) and CESD (CD1,CD2) fibroblasts were treated as in figure 5, either with (+rhLAL) or without treatment with recombinant human LAL. Lipids from cells and media were extracted and the pooled lipid fractions were separated by gas chromatography and the mass of 27-HC was quantified as described in Experimental Procedures. Results represent the difference

between LDL-loaded and non-LDL-loaded cells, mean  $\pm$  SD of triplicates, and are representative of four experiments with similar results.

# Supplemental Figure 1

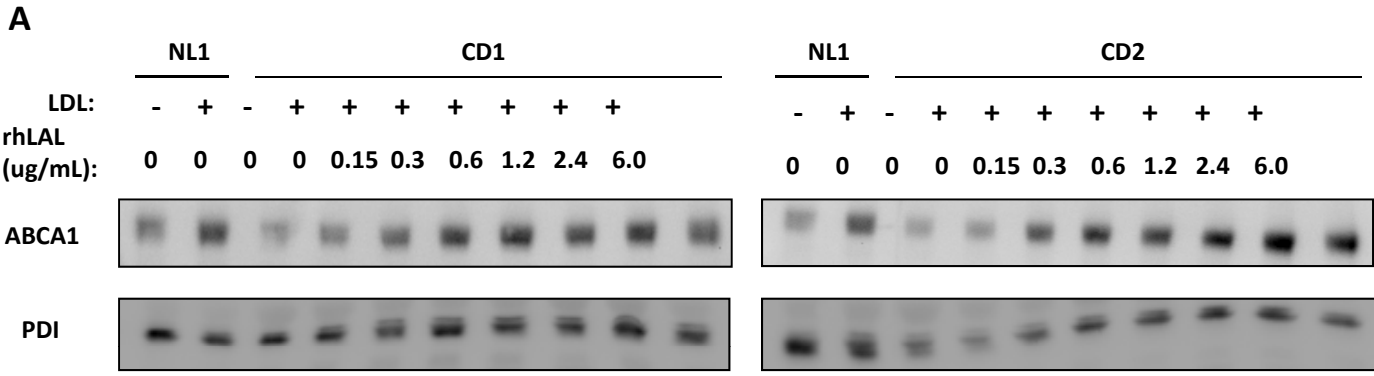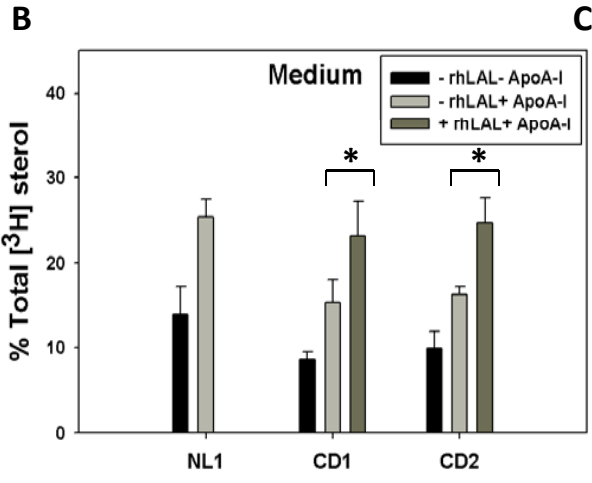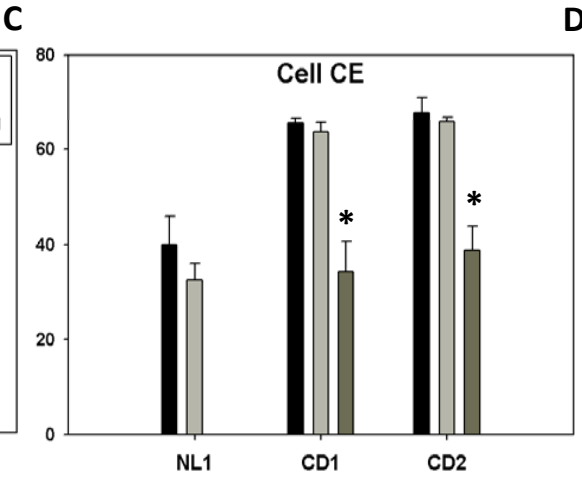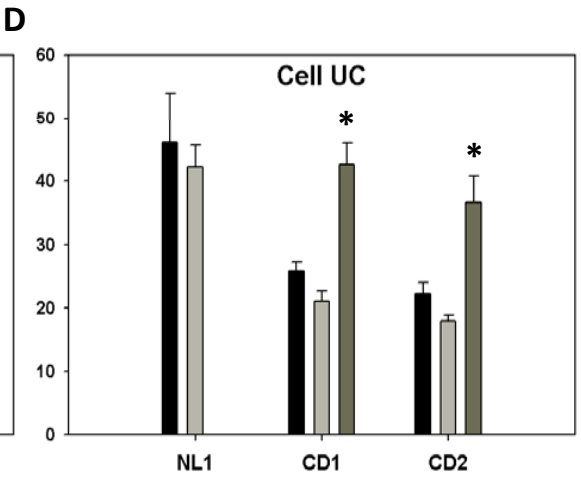

# Supplemental Figure 2

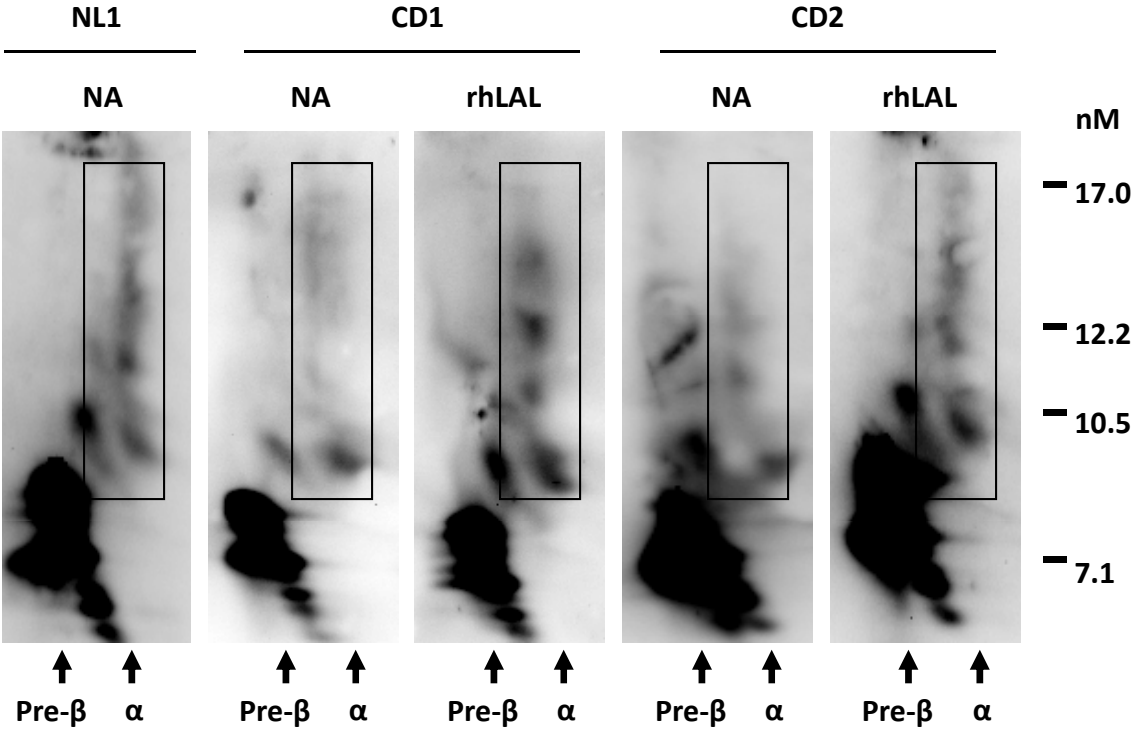

**Supplemental Figure 3**

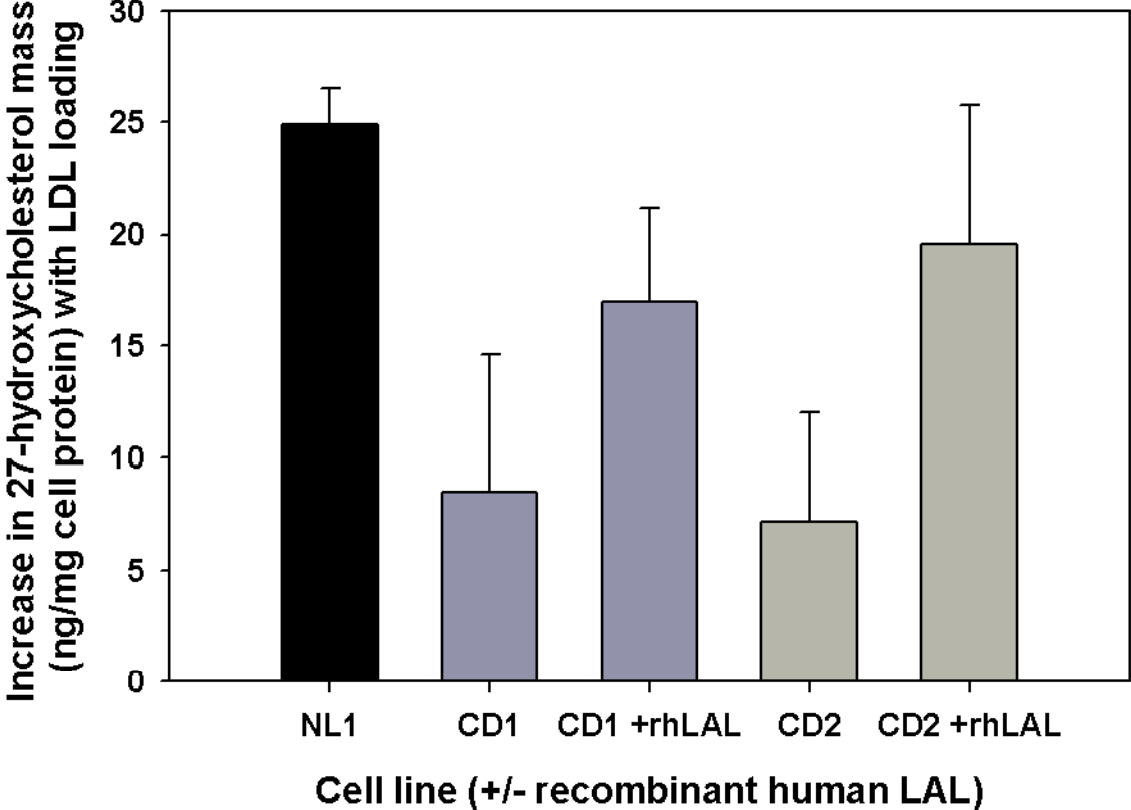

Supplement: supp_M111.274381_jbc.M111.274381-1.pdf [file supp_M111.274381_jbc.M111.274381-1.pdf]
